# Supplementary material for: Mitochondrial ATP transporter depletion protects mice against liver steatosis and insulin resistance
Source: PubMed Central journal article supplement (PMC5316896; doi:10.1038/ncomms14477), 2017-02-16
Supplement: ncomms14477-s1.pdf [file ncomms14477-s1.pdf]

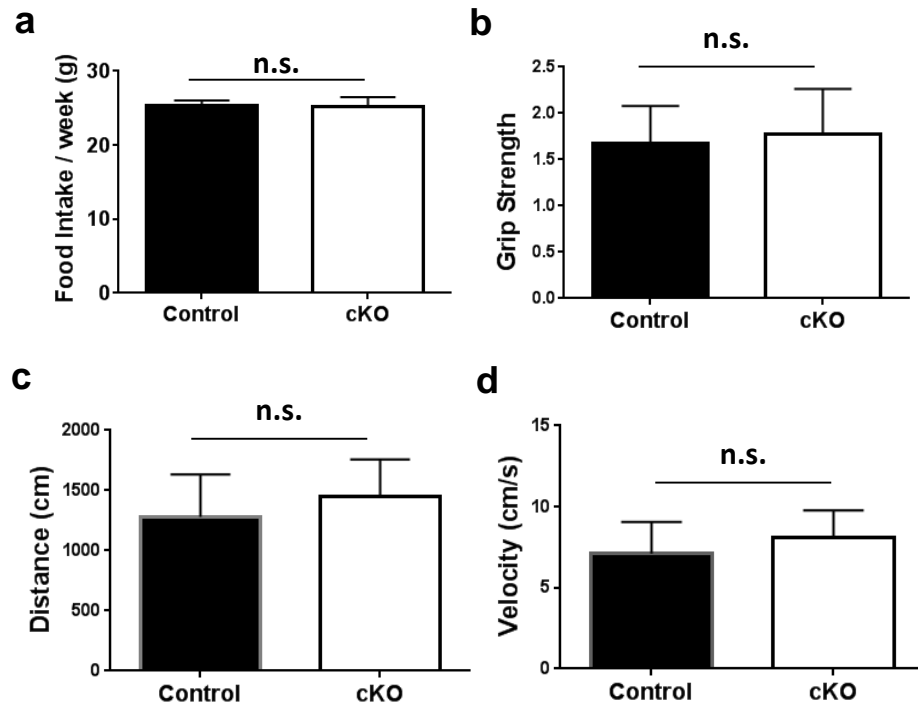

Supplementary Figure 1

**Supplementary figure 1: Food intake and physical capacities.** (a) Amount of food intake weekly (n=20, t-test, error bars=s.d.). (b) Grip strength (n=6, t-test, error bars=s.d.). (c) Total running distance (n=6, t-test, error bars=s.d.). (d) Running velocity (n=6, t-test, error bars=s.d.).

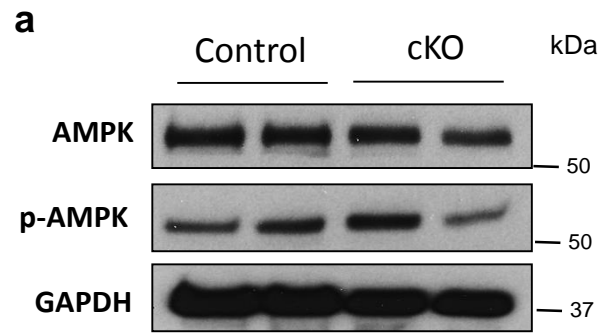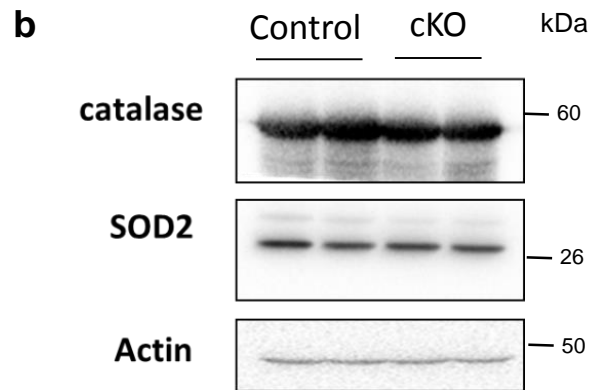

Supplementary Figure 2

**Supplementary figure 2: Cellular AMPK and antioxidant enzymes.** (a) Immunoblot analysis for total AMPK, phosphorylated AMPK and GAPDH expression in liver lysates. (b) Immunoblot analysis for catalase, superoxide dismutase 2 (SOD2), and  $\beta$ -actin expression in liver lysates.

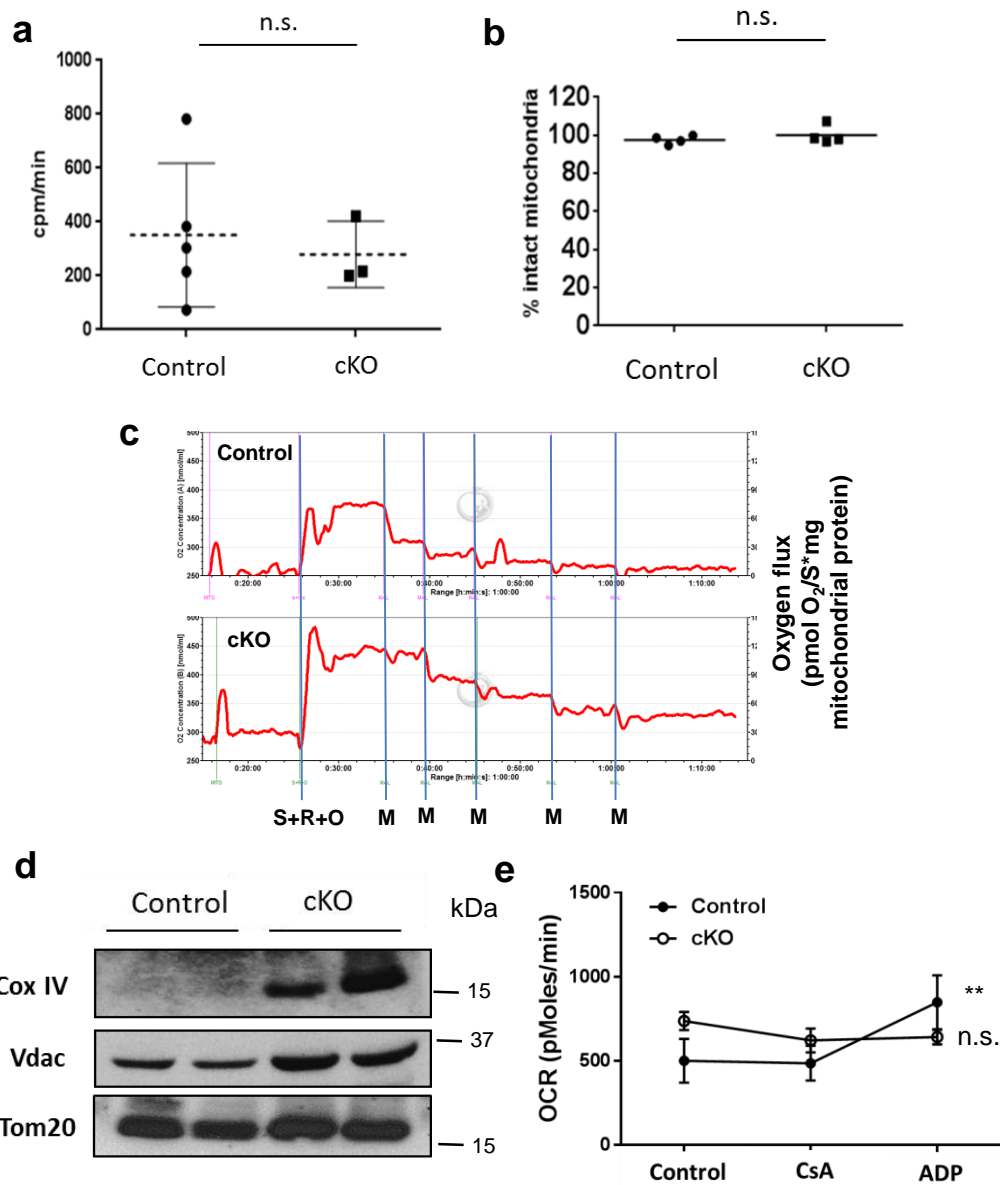

Supplementary Figure 3

**Supplementary figure 3: Inner/outer membrane integrity and respiration measurement in *Ant2*-deleted liver mitochondria.** (a) Pyruvate uptake capacity measured by [<sup>14</sup>C]Pyruvate uptake in isolated liver mitochondria (n=3~5, t-test, error bars=s.d.). (b) Oxidation of reduced cytochrome c in isolated liver mitochondria (n=4, t-test, error bars=s.d.). (c) Representative traces of oxygen flux of liver mitochondria assessed with the Oroboros O2k respirometer in the presence of succinate, rotenone, and oligomycin (S+R+O), and malonate (M) (n=4). (d) Immunoblot analysis in isolated mitochondria for cytochrome c oxidase (Cox) IV, voltage dependent anion channel (Vdac), and Tom20. (e) Mitochondrial OCR assessed with XF24 extracellular flux analyzer (Seahorse) under sequential treatment of CsA and ADP (n=4; \*\*P<0.01 by one-way ANOVA, error bars=s.d.).

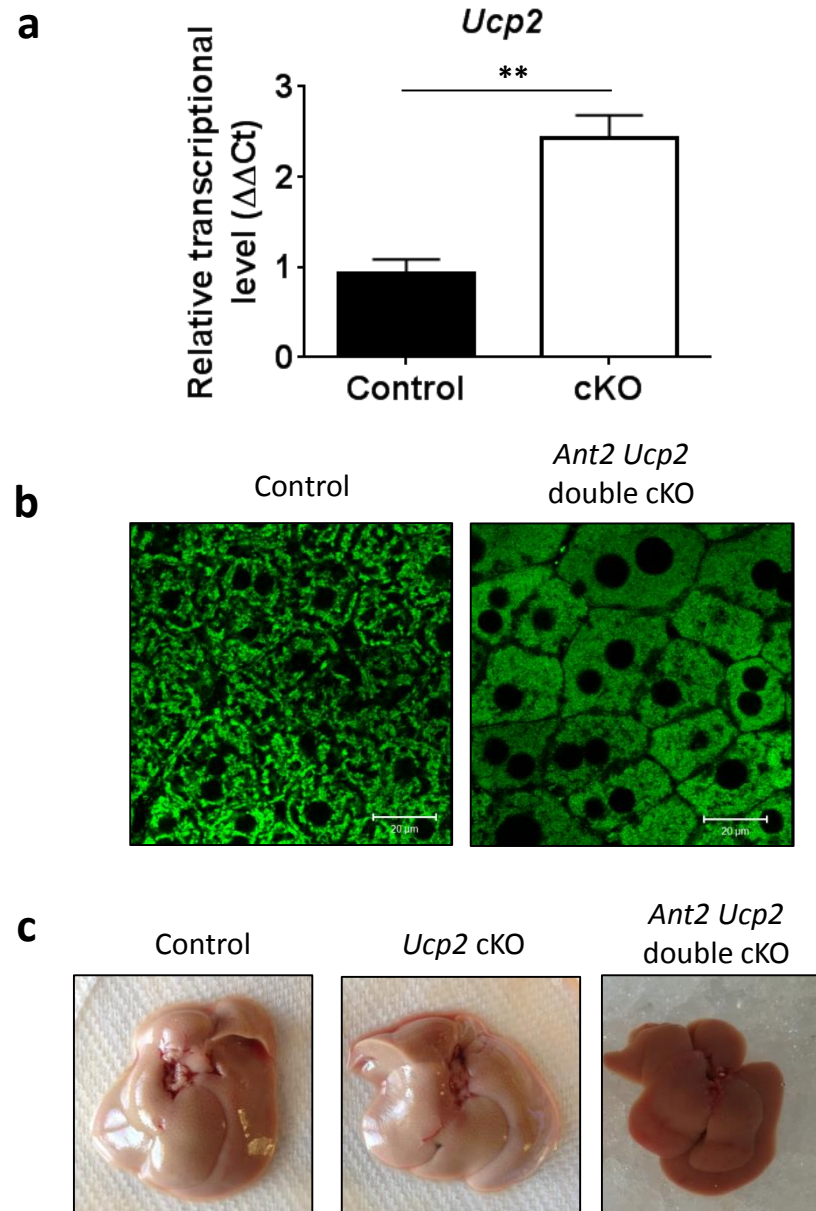

Supplementary Figure 4

**Supplementary figure 4: Phenotypes of *Ucp2* cKO liver and mitochondria.** (a) qRT-PCR analysis for *Ucp2* mRNA expression in the liver (n=3; \*\*P<0.01 by t-test, error bars=s.d.). (b) Multiphoton microscopy analysis after the liver was perfused with Rhodamine-123 (n=3). Scale bar; 20  $\mu$ m. (c) Liver gross appearance under a high fat/high fructose diet (8 weeks) (n>4).



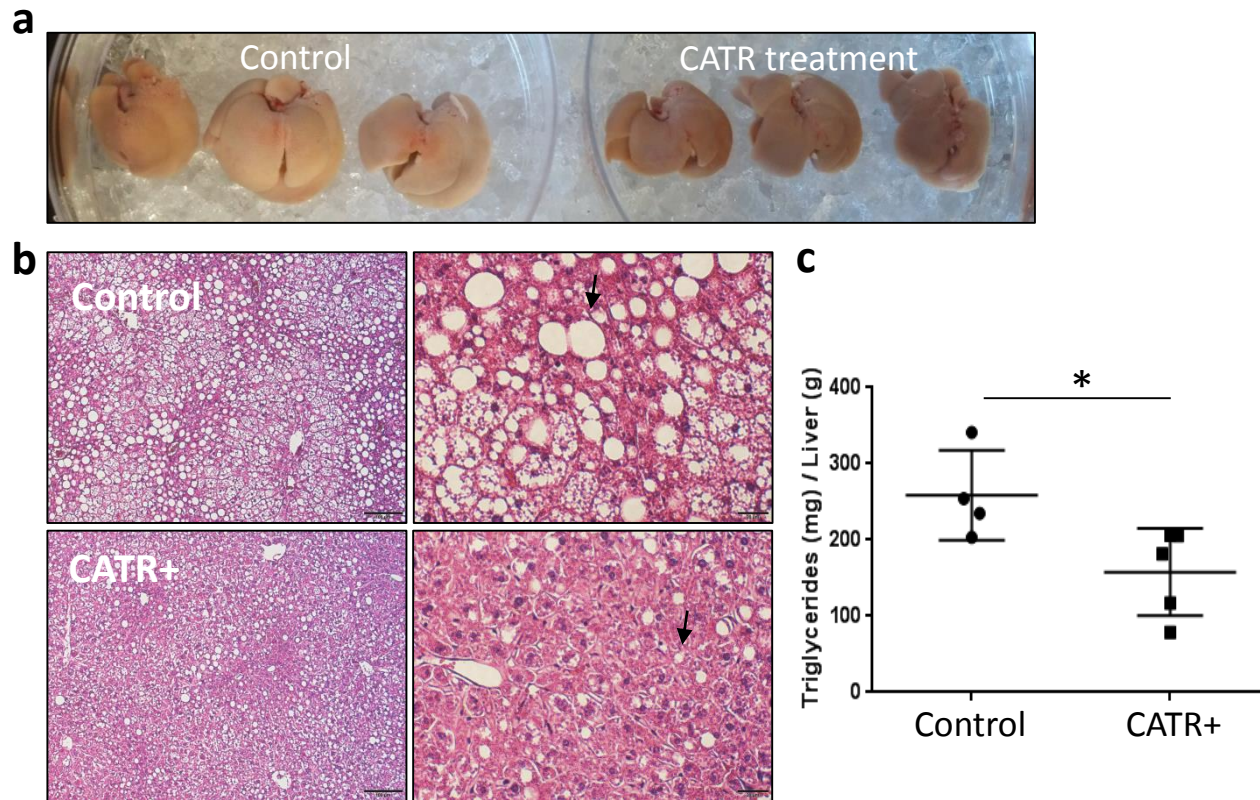

Supplementary Figure 5

**Supplementary figure 5: Systemic CATR treatment a high fat and high fructose diet.** Wild type C57BL6 mice were subjected to a high fat (40%)/high fructose (20%) diet for 8 weeks. During the last two weeks, CATR (1 mg/kg) or vehicle (PBS) (Control) was administered daily by intraperitoneal injection. **(a)** Liver gross appearance. **(b)** Liver histology analysis with H&E staining. Scale bars; 100  $\mu$ m (left panels) and 20  $\mu$ m (right panels). **(c)** Total triglyceride levels in the liver (\* $P$ <0.05 by t-test, error bars=s.d.).

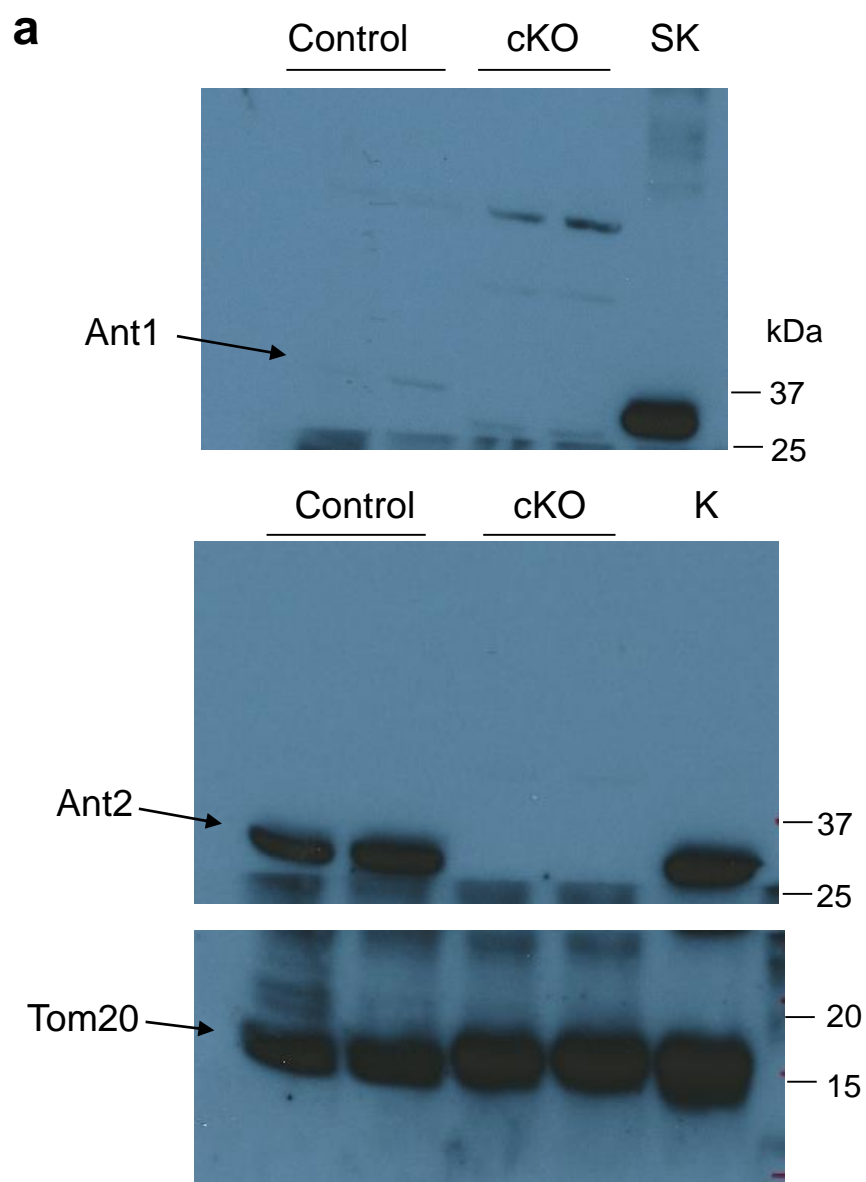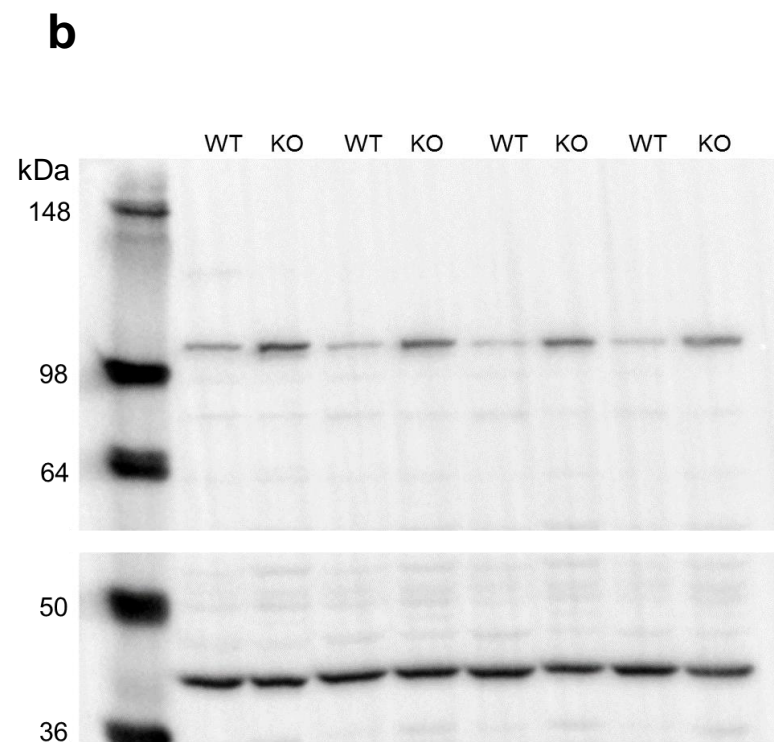

Supplementary Figure 6

**Supplementary figure 6: Uncropped scan of critical immunoblots.** Original uncropped scan data of Fig. 1b **(a)** and Fig. 2d **(b)** are shown here.

| <b>Blood Chemistry</b> | <b>Control</b> | <b><i>Ant2</i>cKO</b> |
|------------------------|----------------|-----------------------|
| ALT (U/L)              | 58.8 ± 16.4    | 69.1 ± 29.9           |
| AST (U/L)              | 235.8 ± 124.1  | 241.9 ± 102.4         |
| Albumin (g/dL)         | 3.9 ± 0.3      | 3.8 ± 0.3             |
| Bilirubin (mg/dL)      | 0.5 ± 0.2      | 0.6 ± 0.2             |
| Total Protein (g/dL)   | 6.2 ± 0.3      | 5.7 ± 0.5             |
| Lactate (mM)           | 6.3 ± 1.7      | 6.7 ± 2               |
| Glucose** (mg/dL)      | 212.6 ± 103.7  | 125.2 ± 9             |
| Cholesterol** (mg/dL)  | 130.0 ± 29.1   | 81.8 ± 16.2           |
| Insulin** (ng/ml)      | 1071 ± 251     | 470 ± 99              |
| Ketone Body*** (μM)    | 111.2 ± 49.4   | 325.2 ± 128.0         |
| Urea* (mM)             | 6.1 ± 1.2      | 5.0 ± 1.2             |

**Supplementary Table 1: Blood chemistry of control and *Ant2* cKO mice (16-18 weeks old, n>10) \*P < 0.05, \*\*p<0.01, \*\*\*p<0.001**
